# Supplementary material for: Altered leukocyte gene expression after traumatic spinal cord injury: clinical implications
Source: PubMed Central journal article supplement — Neural Regen Res. 2018 Sep;13(9):1524–9. doi: 10.4103/1673-5374.237112 (PMC6126132; doi:10.4103/1673-5374.237112), 2018-09
Supplement: NRR-13-1524_Suppl1.pdf [file NRR-13-1524_Suppl1.pdf]

## PEER-REVIEW REPORT 1

**Name of journal:** Neural Regeneration Research

**Manuscript NO:** NRR-D-18-00251

**Title:** Altered leukocyte gene expression after traumatic spinal cord injury: clinical implications

**Reviewer's Name:** Tetsuro Tamaki

**Reviewer's country:** Japan

**Date sent for review:** 2018-04-19

**Date reviewed:** 2018-04-20

**Review time:** 1 Day

### COMMENTS TO AUTHORS

It should be necessary the appropriate Figure instead of current one.

I think that a current Figure 1 is not so important (as is generally included text book), instead, some kind of summary of the author's findings, may be using the flowchart, should be a better presentation for better/easy understanding.

Basically, this review is well written, and easily understandable the contextual meaning about the traumatic Spinal Cord Injury. Therefore, I have only a few comments below.

Page 3, line 7.

CNS should be spelled out.

Please use the table for the American Spinal Injury Association (ASIA) Impairment Scale (AIS) grades, to make the easy recognition of the reader.
